# Supplementary figures and images for: The Impact of Chronic Kidney Disease and Short-Term Treatment with Rosiglitazone on Plasma Cell-Free DNA Levels
Source: Hindawi journal article supplement (doi:10.1155/2014/643189), 2014-01-01

**A**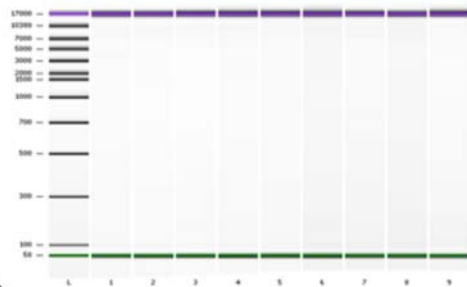**B**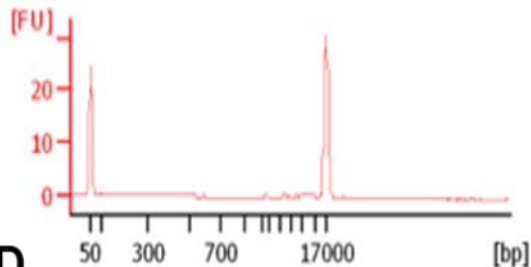**D**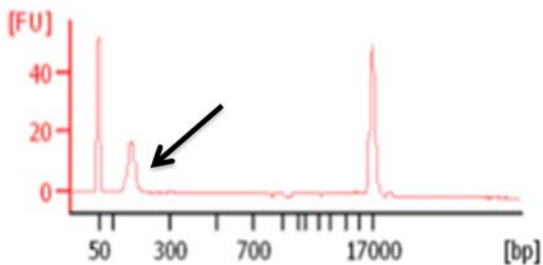

Supplement: f1 [file 643189.f1.zip]

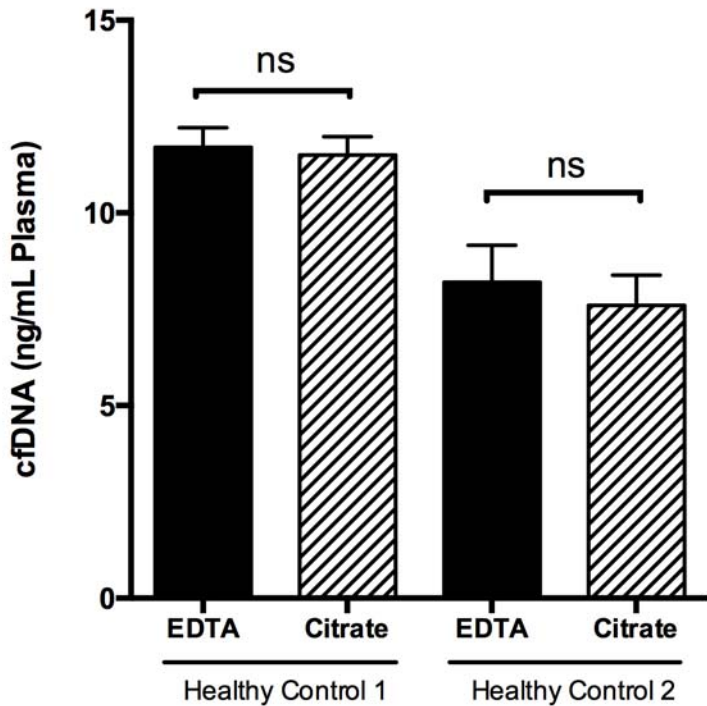

Supplement: f1 [file 643189.f1.zip]
